# Supplementary material for: Surface hydroxylation induced by alkaline-earth metal doping in NiO nanocrystals and its application in achieving a wide temperature operation window for preferential CO oxidation
Source: Royal Society of Chemistry journal article supplement (doi:10.1039/c8en00507a), 2018-01-01
Supplement: c8en00507a1.pdf [file c8en00507a1.pdf]

## Supporting Information

### **Surface Hydroxylation Induced by Alkaline-earth Metal Doping in NiO Nanocrystals and Its Application in Achieving a Wide Temperature Operation Window of Preferential CO Oxidation**

Huixia Li,<sup>a</sup> Liping Li,<sup>a</sup> Shaofan Fang,<sup>b</sup> Jianghao Wang,<sup>b</sup> Shaoqing Chen,<sup>c</sup> Xinsong Huang,<sup>b</sup> Zhihua Leng,<sup>a</sup> Guangshe Li\*,<sup>a</sup>

<sup>a</sup>State Key Laboratory of Inorganic Synthesis and Preparative Chemistry, College of Chemistry, Jilin University, Changchun 130012, P.R. China.

<sup>b</sup>Key Laboratory of Design and Assembly of Functional Nanostructures, Fujian Institute of Research on the Structure of Matter, Fuzhou 350002, P. R. China.

<sup>c</sup>Department of Materials Science and Engineering, Southern University of Science and Technology, Shenzhen, Guangdong 518055, China

## Table of contents

| Details                                                                                                                                                                                                                                                          | Page No. |
|------------------------------------------------------------------------------------------------------------------------------------------------------------------------------------------------------------------------------------------------------------------|----------|
| <b>Figure S1.</b> TEM images of $\text{Ni}_{0.5}\text{Mg}_{0.5}\text{O}$ solid solution via the precipitate process of Mg after Ni.                                                                                                                              | 4        |
| <b>Figure S2.</b> Scanning electron micrographs of (a) the support $\text{Ni}_{0.5}\text{Mg}_{0.5}\text{O}$ , (b) $\text{Pt}/\text{Ni}_{0.5}\text{Mg}_{0.5}\text{O}$ catalyst, (c) $\text{Pt}/\text{NiO}$ , and (d) $\text{Pt}/\text{Mg}(\text{OH})_2$ catalyst. | 5        |
| <b>FigureS3.</b> TEM images of (a) $\text{Ni}_{0.5}\text{Mg}_{0.5}\text{O}$ , (b) $\text{Pt}/\text{Ni}_{0.5}\text{Mg}_{0.5}\text{O}$ , (c) $\text{Pt}/\text{NiO}$ , (d) $\text{Pt}/\text{Mg}(\text{OH})_2$ that show the estimated particle sizes.               | 6        |
| <b>Figure S4.</b> SEM elemental mapping of $\text{Ni}_{0.5}\text{Mg}_{0.5}\text{O}$ solid solution.                                                                                                                                                              | 7        |
| <b>Figure S5.</b> The surface photovoltage spectra (SPV) of $\text{Pt}/\text{Ni}_{0.5}\text{Mg}_{0.5}\text{O}$ , $\text{Pt}/\text{MgO}$ , and $\text{Pt}/\text{NiO}$ catalysts.                                                                                  | 8        |
| <b>Figure S6.</b> $\text{H}_2$ -TPR profiles of $\text{NiO}$ , $\text{MgO}$ , and $\text{Mg}(\text{OH})_2$                                                                                                                                                       | 9        |
| <b>Figure S7.</b> $\text{O}_2$ conversion of all catalysts                                                                                                                                                                                                       | 10       |
| <b>Figure S8.</b> $\text{CO}_2$ Selectivity of four catalysts. PROX reactions were perform over the four catalysts at $\text{C}:\text{O}_2$ ratios of 1:1.25 and a GHSV of $80000\text{ h}^{-1}$ .                                                               | 11       |
| <b>Figure S9.</b> XRD patterns of the used catalysts of $\text{Pt}/\text{Ni}_{0.5}\text{Mg}_{0.5}\text{O}$ , $\text{Pt}/\text{NiO}$ , and $\text{Pt}/\text{Mg}(\text{OH})_2$ catalysts.                                                                          | 12       |
| <b>Figure S10.</b> CO conversions of Pt supported $\text{Ni}_{1-x}\text{Mg}_x\text{O}$ (0, 0.2, 0.3, 0.4, 0.5) catalysts for CO oxidation reactions in the $\text{H}_2$ -rich condition.                                                                         | 13       |

|                                                                                                                                                                                                                                                               |    |
|---------------------------------------------------------------------------------------------------------------------------------------------------------------------------------------------------------------------------------------------------------------|----|
| <b>Figure S11.</b> DRIFTS obtained CO-PROX conditions (1 % CO, 1.25 % O <sub>2</sub> and 50 % H <sub>2</sub> in He balance) at 30 °C for Pt/Ni <sub>1-x</sub> Mg <sub>x</sub> O (x = 0.2, 0.3, 0.4, 0.5).                                                     | 14 |
| <b>Figure S12.</b> DRIFT spectra as a function of temperature under operando PROX conditions (1 % CO, 1.25 % O <sub>2</sub> and 50 % H <sub>2</sub> in He balance) with (a) Ni <sub>0.5</sub> Mg <sub>0.5</sub> O, (b) Pt/NiO, and (c) Pt/Mg(OH) <sub>2</sub> | 15 |
| <b>Figure S13.</b> TEM images of the Pt/Ni <sub>0.5</sub> Mg <sub>0.5</sub> O and Pt/NiO after the stability test for 50 h.                                                                                                                                   | 16 |
| <b>Figure S14.</b> In situ DRIFTS study of N <sub>2</sub> purging, CO adsorption, O <sub>2</sub> removal on the Pt/Ni <sub>0.5</sub> Mg <sub>0.5</sub> O catalyst. (CO flow rate, 10 mL min <sup>-1</sup> ; catalyst mass, 30 mg; temperature, 140 °C).       | 17 |
| <b>Table S1.</b> Particulate properties of the used catalysts.                                                                                                                                                                                                | 18 |
| <b>Table S2.</b> Structural Refinement Results for Pt/Ni <sub>1-x</sub> Mg <sub>x</sub> O Using GSAS software                                                                                                                                                 | 19 |
| <b>Table S3.</b> Comparison of catalytic performance in CO-PROX over Pt/Ni <sub>0.5</sub> Mg <sub>0.5</sub> O and those catalysts reported in literature.                                                                                                     | 20 |
| <b>Reference</b>                                                                                                                                                                                                                                              | 21 |

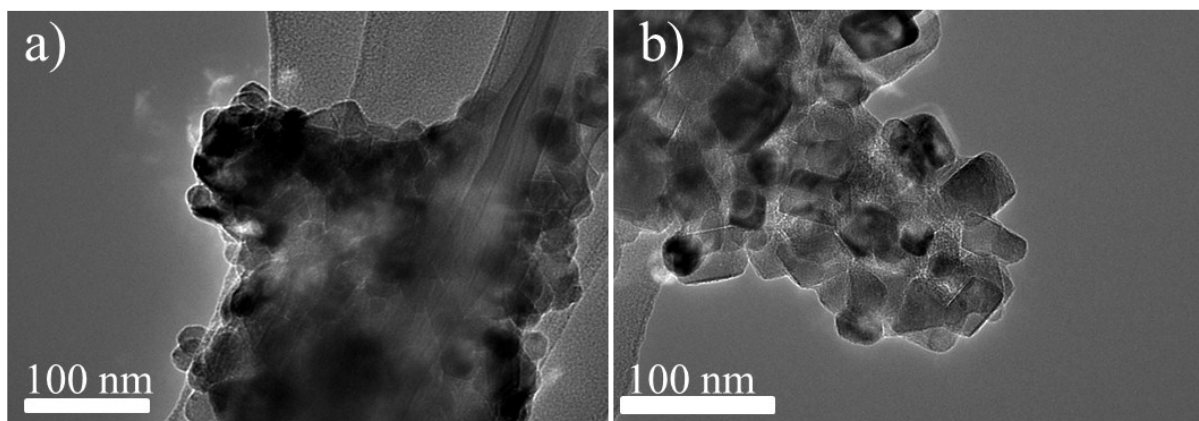

**Figure S1.** TEM images of  $\text{Ni}_{0.5}\text{Mg}_{0.5}\text{O}$  solid solution via the precipitate process of Mg after Ni.

As shown in Figure S1, we carried out the precipitate process of Mg after Ni to obtain the  $\text{Ni}_{0.5}\text{Mg}_{0.5}\text{O}$  samples. Although the sample presented the irregular nanosheets morphology, the nanosheets were severely accumulative which could severely hinder the exposure of active site and the support of noble metals.

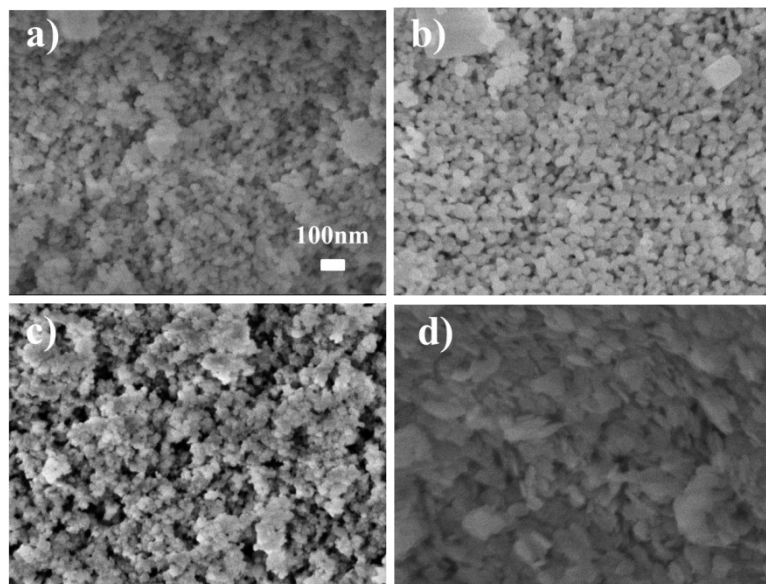

**Figure S2.** Scanning electron micrographs of (a) the  $\text{Ni}_{0.5}\text{Mg}_{0.5}\text{O}$  support, (b)  $\text{Pt}/\text{Ni}_{0.5}\text{Mg}_{0.5}\text{O}$  catalyst (c)  $\text{Pt}/\text{NiO}$  and (d)  $\text{Pt}/\text{Mg}(\text{OH})_2$  catalyst.

SEM images of the catalysts are shown in Figure S1.  $\text{Ni}_{0.5}\text{Mg}_{0.5}\text{O}$  and  $\text{Pt}/\text{Ni}_{0.5}\text{Mg}_{0.5}\text{O}$  catalysts (Figures S1a and S1b) present uniform size. Although  $\text{Pt}/\text{NiO}$  catalyst (Figure. S1c) exhibited a similar morphology to  $\text{Pt}/\text{Ni}_{0.5}\text{Mg}_{0.5}\text{O}$  catalyst, the nanosheets in  $\text{Pt}/\text{NiO}$  exhibited a slight agglomeration.  $\text{Pt}/\text{Mg}(\text{OH})_2$  catalyst consisted of hexagonal nanoflakes (Figure S1d). The average size of hexagonal nanoflakes was larger than those of other catalysts.

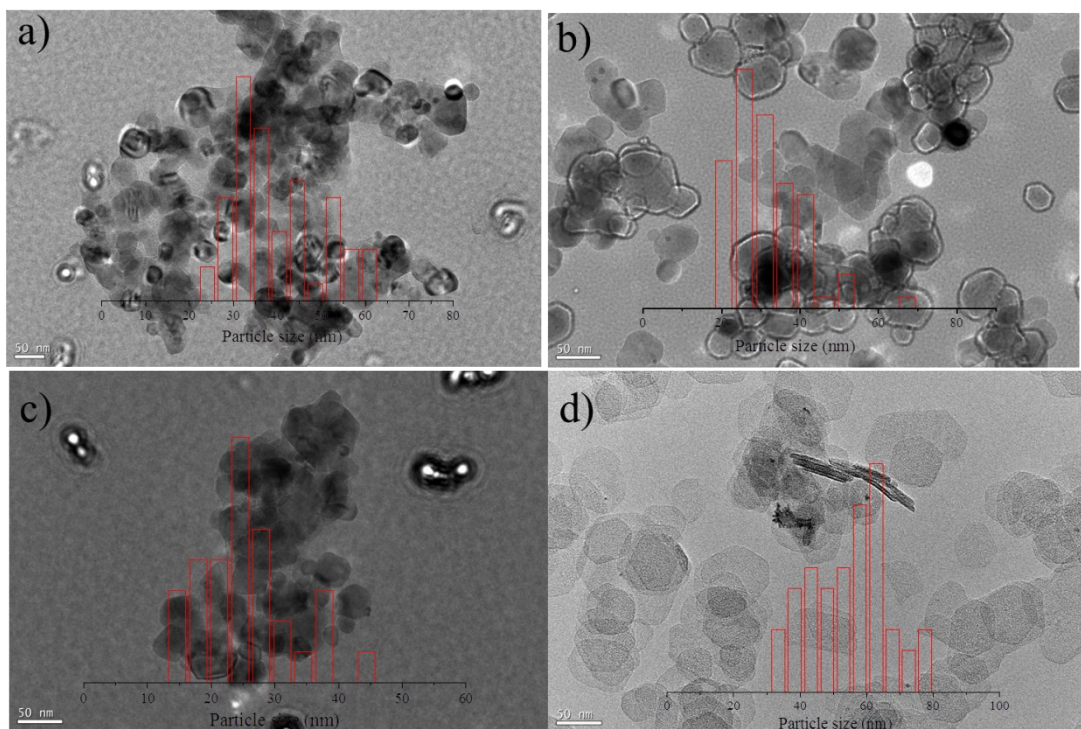

**Figure S3.** TEM images of (a)  $\text{Ni}_{0.5}\text{Mg}_{0.5}\text{O}$ , (b)  $\text{Pt}/\text{Ni}_{0.5}\text{Mg}_{0.5}\text{O}$ , (c)  $\text{Pt}/\text{NiO}$ , and (d)  $\text{Pt}/\text{Mg}(\text{OH})_2$  that show the estimated particle sizes.

The particle size distribution for  $\text{Ni}_{0.5}\text{Mg}_{0.5}\text{O}$  support is about 30-40 nm. After supporting Pt, particle size distribution has not changed. This result indicates that supporting Pt catalyst had no distinct effect on the particle size. The particle size distributions for  $\text{Pt}/\text{NiO}$  and  $\text{Pt}/\text{Mg}(\text{OH})_2$  catalysts, are about 20-30 and 50- 60 nm, respectively. The particle size distribution of  $\text{Pt}/\text{Ni}_{0.5}\text{Mg}_{0.5}\text{O}$  catalyst is between  $\text{Pt}/\text{NiO}$  and  $\text{Pt}/\text{Mg}(\text{OH})_2$ .

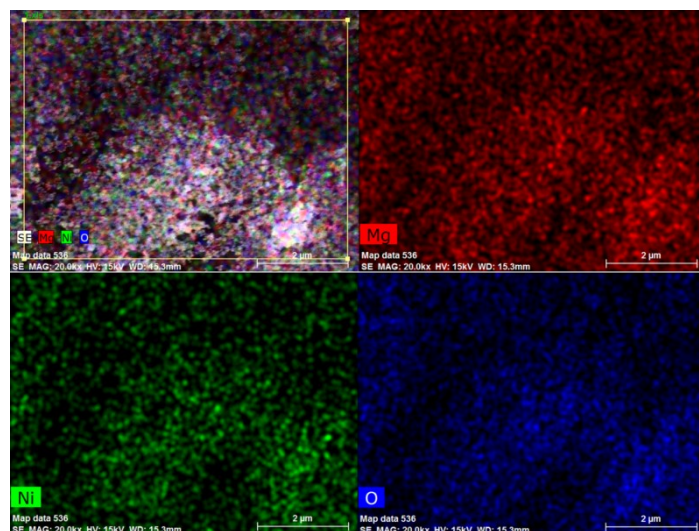

**Figure S4.** SEM elemental mapping of  $\text{Ni}_{0.5}\text{Mg}_{0.5}\text{O}$  solid solution.

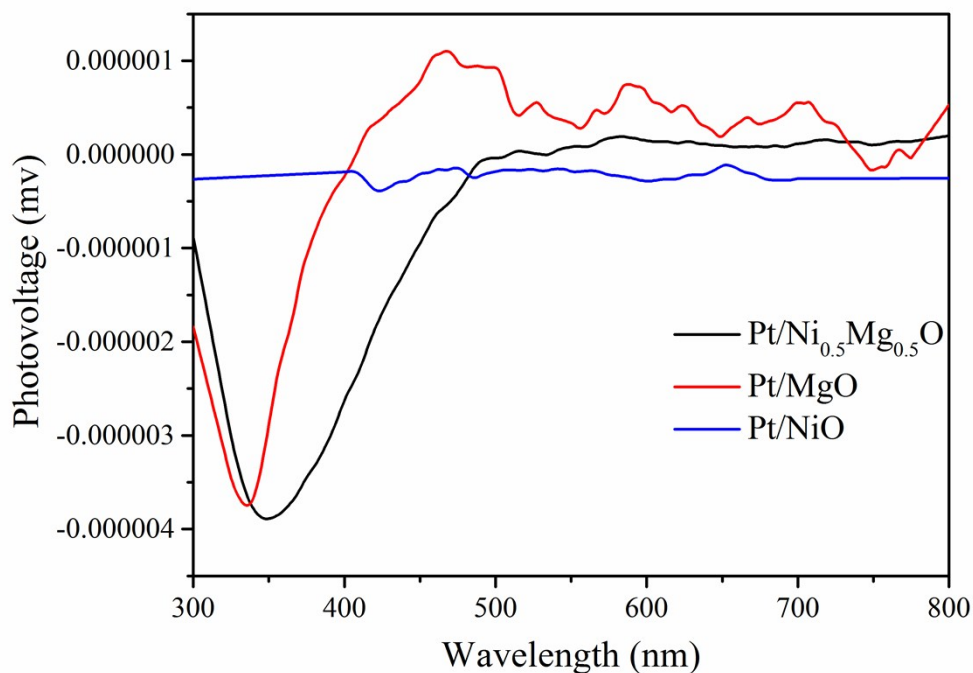

**Figure S5.** Surface photovoltage spectra (SPV) of Pt/Ni<sub>0.5</sub>Mg<sub>0.5</sub>O, Pt/MgO and Pt/NiO catalysts.

For the SPV response, a positive signal implies a positive charge accumulation at the surface of the sample. On the contrary, a negative signal is produced due to the negative charge accumulation at the surface. For Pt/Ni<sub>0.5</sub>Mg<sub>0.5</sub>O catalyst, a weak negative SPV response arises between 300 and 488 nm, which implies a negative charge accumulation at the surface. Pt/MgO performs the similar behavior to Pt/Ni<sub>0.5</sub>Mg<sub>0.5</sub>O. However, Pt/NiO has no SPV response. Therefore, the electron is supplied from the magnesium ions to the active metal in the catalyst and strengthens CO adsorption.

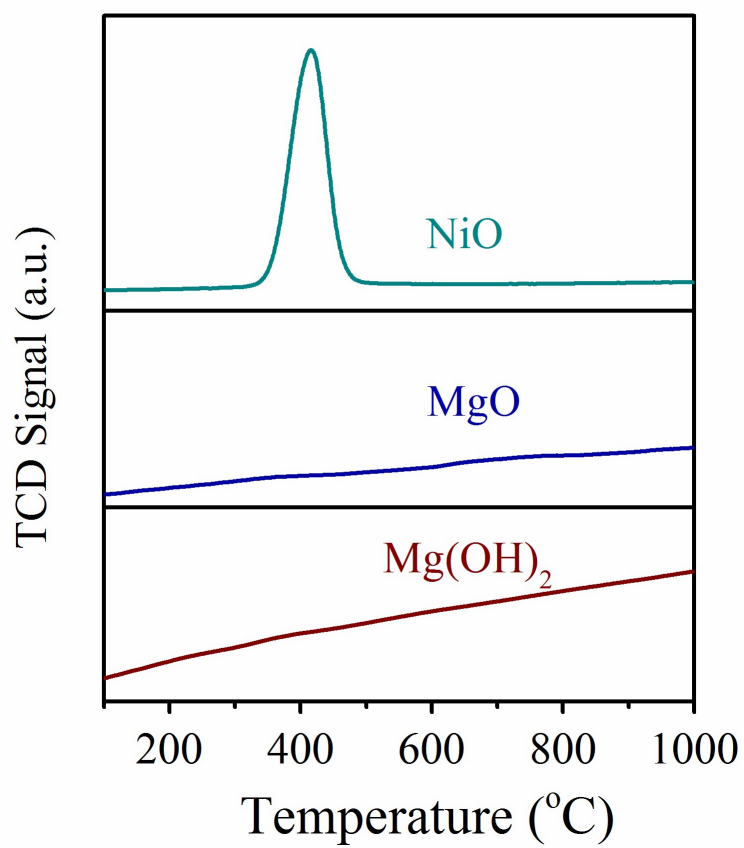

**Figure S6.** H<sub>2</sub>-TPR profiles of the contrast samples NiO, MgO, and Mg(OH)<sub>2</sub>.

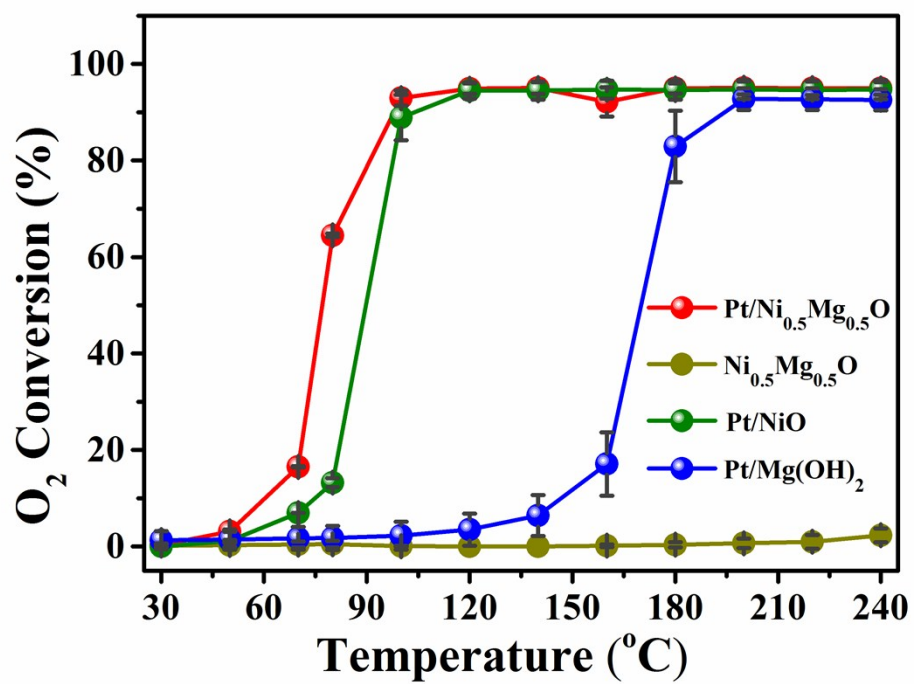

**Figure S7.** O<sub>2</sub> conversion of all catalysts.

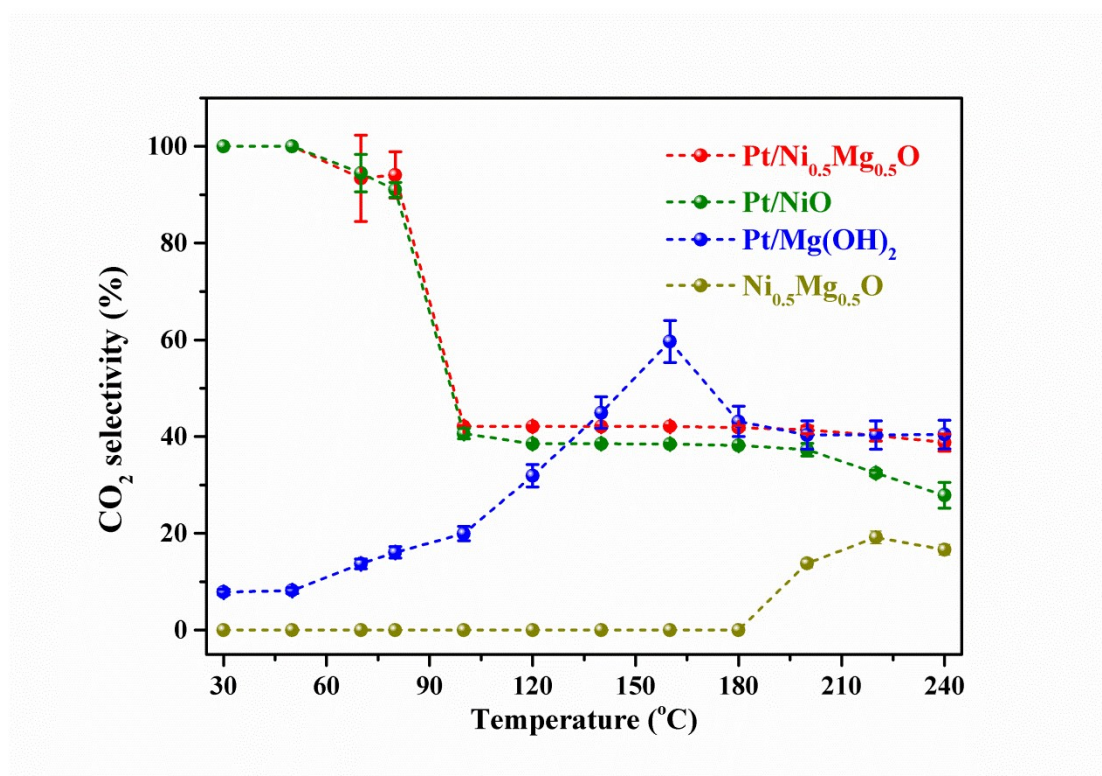

**Figure S8.** CO<sub>2</sub> selectivity of four catalysts. PROX reactions were performed over the four catalysts at C:O<sub>2</sub> ratios of 1:1.25 and a GHSV of 80000 h<sup>-1</sup>.

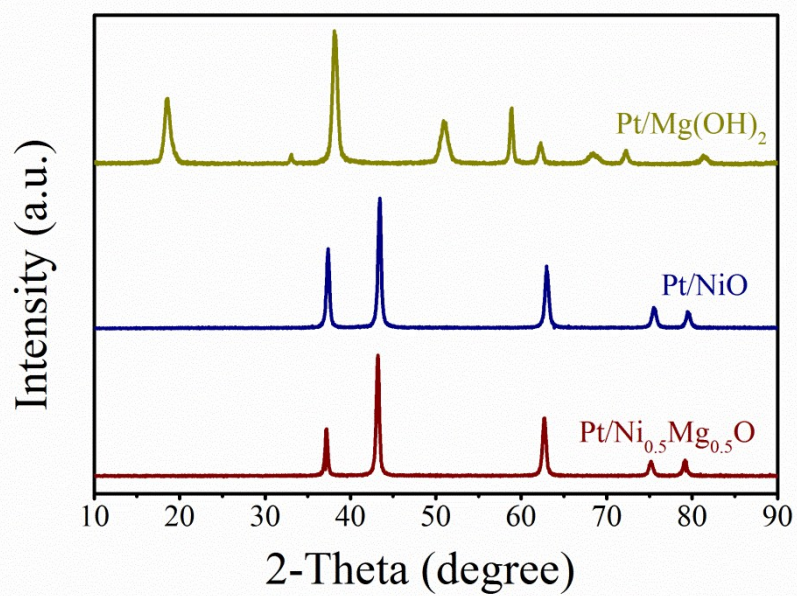

**Figure S9.** XRD patterns of the catalysts used Pt/Ni<sub>0.5</sub>Mg<sub>0.5</sub>O, Pt/NiO, and Pt/Mg(OH)<sub>2</sub>.

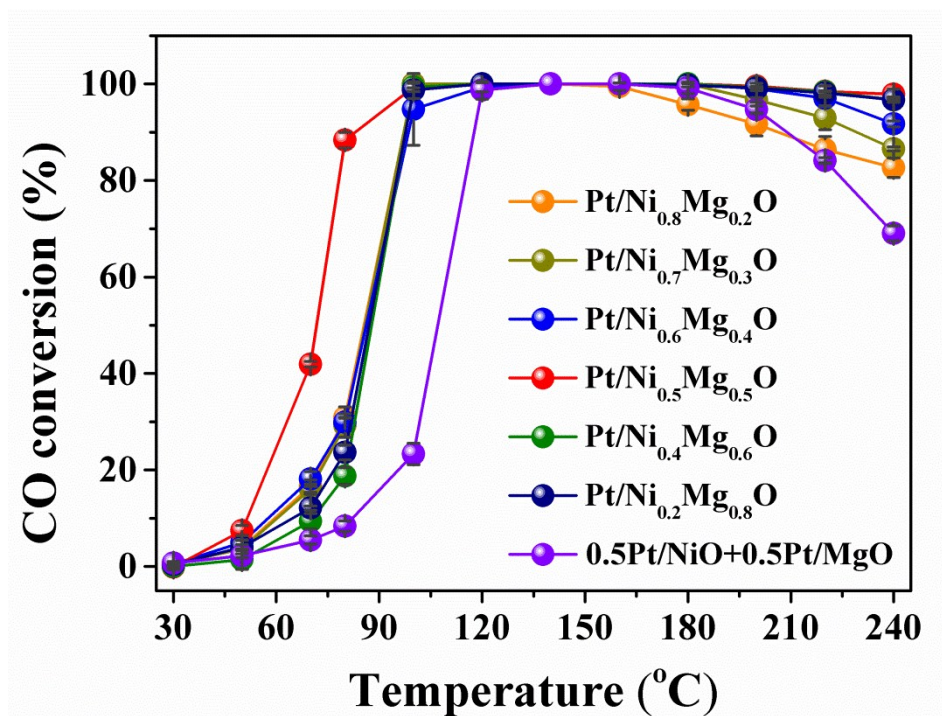

**Figure S10.** CO conversions of Pt supported Ni<sub>1-x</sub>Mg<sub>x</sub>O (0, 0.2, 0.3, 0.4, 0.5, 0.6, 0.8)

solid solutions for CO oxidation reactions in H<sub>2</sub>-rich condition.

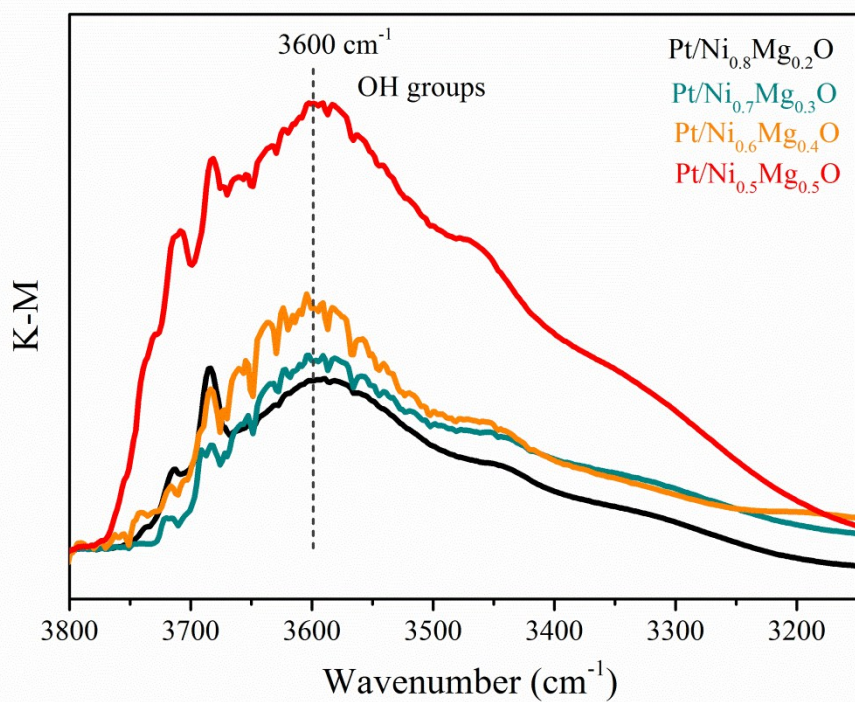

**Figure S11.** DRIFTS recorded for Pt/Ni<sub>1-x</sub>Mg<sub>x</sub>O (x = 0.2, 0.3, 0.4, 0.5) under the CO-PROX measurement conditions (i.e., 1 % CO, 1.25 % O<sub>2</sub> and 50 % H<sub>2</sub> in He balance) at 30 °C.

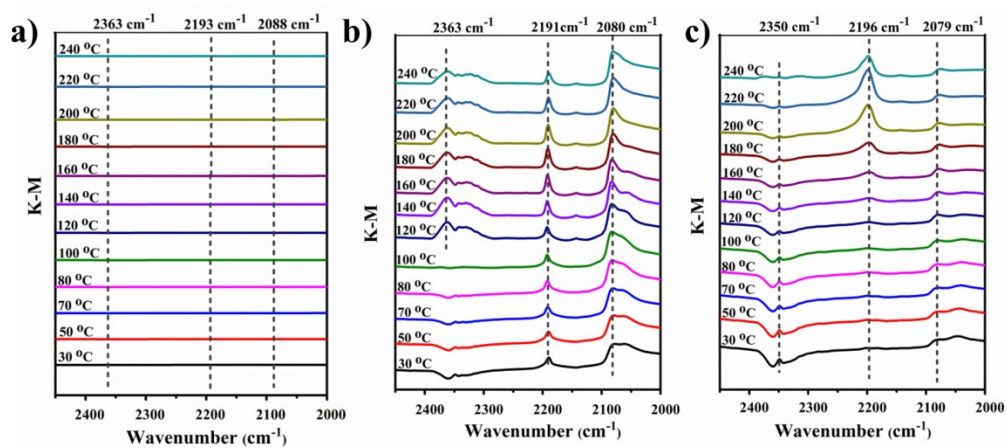

**Figure S12.** DRIFT spectra recorded for (a)  $\text{Ni}_{0.5}\text{Mg}_{0.5}\text{O}$ , (b)  $\text{Pt/NiO}$ , and (c)  $\text{Pt/Mg(OH)}_2$  as a function of temperature under operando PROX conditions (i.e., 1 %  $\text{CO}$ , 1.25 %  $\text{O}_2$  and 50 %  $\text{H}_2$  in He balance).

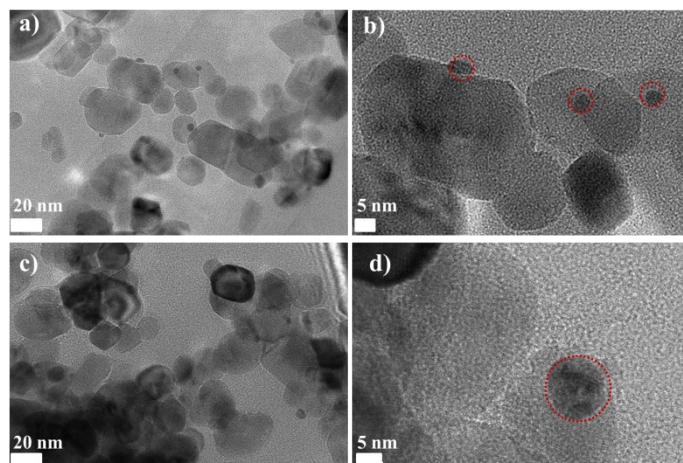

**Figure S13.** TEM images of the Pt/Ni<sub>0.5</sub>Mg<sub>0.5</sub>O and Pt/NiO after the stability test for 50 h.

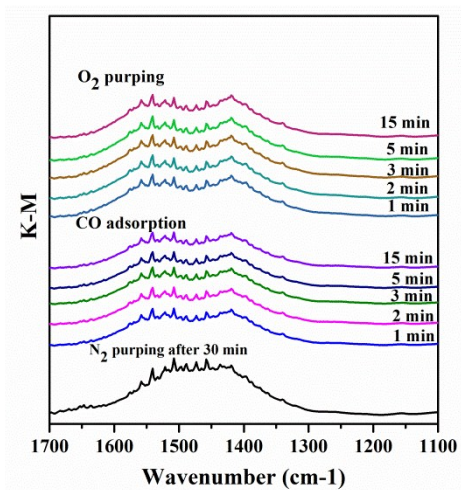

**Figure S14.** In situ DRIFTS study of N<sub>2</sub> purging, CO adsorption, O<sub>2</sub> removal on the Pt/Ni<sub>0.5</sub>Mg<sub>0.5</sub>O catalyst. (CO flow rate, 10 mL min<sup>-1</sup>; catalyst mass, 20 mg; temperature, 140 °C).

In situ DRIFTS was carried out to identify the active species by analyzing the spectral range of 1700-1100 cm<sup>-1</sup>. In a typical steady test, the powder sample (ca. 20 mg) was purged in N<sub>2</sub> for 30 min at room temperature and a background spectrum was collected via 48 scans at 4 cm<sup>-1</sup> resolution. The reaction gas with 10 % CO/N<sub>2</sub> was introduced into the in situ chamber (10 mL min<sup>-1</sup>) and heated to 140 °C. Once the CO adsorption lasted 15 min, the gas channel was switched immediately to 20 % O<sub>2</sub>/N<sub>2</sub>. These peaks hardly were observed change significantly when undergo the process of 10 % CO/N<sub>2</sub> shifting to 20 % O<sub>2</sub>/N<sub>2</sub> compared to the treatment of N<sub>2</sub>. The reason for this phenomenon is the presence of surface bicarbonates, which have lower thermal stability in comparison to carbonate species. The surface bicarbonates would favor a faster desorption of CO<sub>2</sub>, leaving the surface available for further chemisorptions, through which the CO oxidation is accelerated.

**Table S1.** Particulate properties of the catalysts used.

| Samples                                     | Surface area        | Pore volume          | Pore diameter (nm) |
|---------------------------------------------|---------------------|----------------------|--------------------|
|                                             | (m <sup>2</sup> /g) | (cm <sup>3</sup> /g) |                    |
| <b>Pt/Ni<sub>0.5</sub>Mg<sub>0.5</sub>O</b> | 24                  | 0.14                 | 27                 |
| <b>Ni<sub>0.5</sub>Mg<sub>0.5</sub>O</b>    | 27                  | 0.13                 | 26                 |
| <b>Pt/NiO</b>                               | 19                  | 0.11                 | 22                 |
| <b>Pt/Mg(OH)<sub>2</sub></b>                | 73                  | 0.43                 | 19                 |

**Table S2.** Structural Refinement Results for Pt/Ni<sub>1-x</sub>Mg<sub>x</sub>O Using GSAS software

| Samples                                  | Cell parameters | Rp     | Rwp    | $\chi^2$ |
|------------------------------------------|-----------------|--------|--------|----------|
|                                          | a (Å)           |        |        |          |
| Pt/NiO                                   | 4.1795(8)       | 0.0618 | 0.0839 | 4.418    |
| Pt/Ni <sub>0.8</sub> Mg <sub>0.2</sub> O | 4.1839(8)       | 0.0438 | 0.0588 | 2.845    |
| Pt/Ni <sub>0.7</sub> Mg <sub>0.3</sub> O | 4.1872(1)       | 0.0507 | 0.0668 | 3.703    |
| Pt/Ni <sub>0.6</sub> Mg <sub>0.4</sub> O | 4.1910(2)       | 0.0594 | 0.0851 | 4.778    |
| Pt/Ni <sub>0.5</sub> Mg <sub>0.5</sub> O | 4.1915(7)       | 0.0490 | 0.0694 | 3.429    |
| Pt/Ni <sub>0.4</sub> Mg <sub>0.6</sub> O | 4.1945(6)       | 0.0385 | 0.0542 | 3.814    |
| Pt/Ni <sub>0.2</sub> Mg <sub>0.8</sub> O | 4.1995(6)       | 0.0517 | 0.0749 | 4.532    |
| Pt/ MgO                                  | 4.2087(6)       | 0.0485 | 0.0697 | 2.250    |

**Table S3.** Comparison of catalytic performance in CO-PROX over Pt/Ni<sub>0.5</sub>Mg<sub>0.5</sub>O and those catalysts reported in literature.

| Sample                                                        | Pt loading<br>wt. % | Amount of catalyst<br>(mg) | Space Velocity<br>(ml.g <sub>cat</sub> <sup>-1</sup> .h <sup>-1</sup> ) | Operation temperature window<br>(CO conversion >99.0%) | ref       |
|---------------------------------------------------------------|---------------------|----------------------------|-------------------------------------------------------------------------|--------------------------------------------------------|-----------|
| Pt/Ni <sub>0.5</sub> Mg <sub>0.5</sub> O                      | 0.5                 | 50                         | 80000                                                                   | 100-220 °C                                             | This work |
| Pt/NiO                                                        | 0.5                 | 50                         | 80000                                                                   | 100-180 °C                                             | This work |
| Pt/Mg(OH) <sub>2</sub>                                        | 0.5                 | 50                         | 80000                                                                   | 200-240 °C                                             | This work |
| Pt/Ti <sub>0.5</sub> Ce <sub>0.5</sub> O <sub>2</sub>         | 0.6                 | 100                        | 17000                                                                   | -                                                      | 1         |
| Pt-Ni-Al                                                      | 0.5                 | undefined                  | 12,000                                                                  | 200 °C                                                 | 2         |
| Pt/Co <sub>3</sub> O <sub>4-x</sub>                           | 2.0                 | undefined                  | 42857                                                                   | 110–130 °C                                             | 3         |
| Pt-Ni/CNT-OX                                                  | 2.0                 | 50                         | 48,000                                                                  | 95–120 °C                                              | 4         |
| Pt-Mg/Al <sub>2</sub> O <sub>3</sub>                          | 2.0                 | undefined                  | 60000                                                                   | -                                                      | 5         |
| M-Pt-Ni/Al <sub>2</sub> O <sub>3</sub>                        | 1.0                 | undefined                  | 16000                                                                   | 100-150 °C                                             | 6         |
| Pt/xCeO <sub>2</sub> –<br>(1-x)Nb <sub>2</sub> O <sub>5</sub> | 1.0                 | 100                        | 17000                                                                   | -                                                      | 7         |
| Pt <sub>3</sub> Co/MgO                                        | 3.0                 | 50                         | -                                                                       | 120-160 °C                                             | 8         |
| PtFeNi/CNTs-p                                                 | 3.0                 | 60                         | 25000                                                                   | -                                                      | 9         |
| Pt/CuCrO <sub>x</sub>                                         | 2.0                 | 100                        | 60000                                                                   | 160-200 °C                                             | 10        |
| Pt–<br>Ni/GMMSiO <sub>2</sub>                                 | 2.0                 | 100                        | 24000                                                                   | 95-120 °C                                              | 11        |

## Reference

1. Rico-Francés, S.; Sepúlveda-Escribano, A.; Ramos-Fernandez, E. V.,  $Ti_xCe_{1-x}O_2$  as Pt support for the PROX reaction: Effect of the solvothermal synthesis., *Int. J. Hydrogen Energ.*, 2017, **42** (49), 29262-29273.
2. Mohamed, Z.; Dasireddy, V. D. B. C.; Singh, S.; Friedrich, H. B., The preferential oxidation of CO in hydrogen rich streams over platinum doped nickel oxide catalysts. *Appl. Catal. B: Environ.*, 2016, **180**, 687-697.
3. Nguyen, L.; Zhang, S.; Yoon, S. J.; Tao, F. F., Preferential Oxidation of CO in  $H_2$  on Pure  $Co_3O_{4-x}$  and  $Pt/Co_3O_{4-x}$ . *ChemCatChem*, 2015, **7** (15), 2346-2353.
4. Lu, S.; Zhang, C.; Liu, Y., Carbon nanotube supported Pt–Ni catalysts for preferential oxidation of CO in hydrogen-rich gases, *Int. J. Hydrogen Energ.*, 2011, **36** (3), 1939-1948.
5. Cho, S.-H.; Park, J.-S.; Choi, S.-H.; Kim, S.-H., Effect of magnesium on preferential oxidation of carbon monoxide on platinum catalyst in hydrogen-rich stream, *J. Power Sources*, 2006, **156** (2), 260-266.
6. Lu, S.; Liu, Y.; Wang, Y., Meso-macro-porous monolithic Pt-Ni/ $Al_2O_3$  catalysts used for miniaturizing preferential carbon monoxide oxidation reactor, *Chem. Commun*, 2010, **46** (4), 634-6.
7. Jardim, E. O.; Rico-Francés, S.; Coloma, F.; Anderson, J. A.; Ramos-Fernandez, E. V.; Silvestre-Albero, J.; Sepúlveda-Escribano, A., Preferential oxidation of CO in excess of  $H_2$  on Pt/ $CeO_2$ – $Nb_2O_5$  catalysts, *Appl. Catal. A- Gen.*, 2015, **492**, 201-211.
8. Furukawa, S.; Ehara, K.; Komatsu, T., Unique reaction mechanism of preferential oxidation of CO over intermetallic  $Pt_3Co$  catalysts: surface-OH-mediated formation of a bicarbonate intermediate, *Catal. Sci. Technol*, 2016, **6** (6), 1642-1650.
9. Chen, L.; Bao, Y.; Sun, Y.; Ma, D.; Ye, D.; Huang, B., The graphitic carbon strengthened synergetic effect between Pt and FeNi in CO preferential oxidation in excess hydrogen at low temperature, *Catal. Sci. Technol*, 2016, **6** (1), 98-106.
10. Deng, Y.; Wang, T.; Zhu, L.; Jia, A.-P.; Lu, J.-Q.; Luo, M.-F., Enhanced performance of CO oxidation over  $Pt/CuCrO_x$  catalyst in the presence of  $CO_2$  and  $H_2O$ , *Appl. Surf. Sci.*, 2018, **442**, 613-621.
11. Niu, T.; Zhao, W. W.; Liu, G. L.; Cao, A.; Zhang, L. H.; Liu, Y., The graphene-meso-macroporous  $SiO_2$  supported Pt–Ni alloy nanocatalyst for preferential oxidation of CO in  $H_2$ -rich gases, *Int. J. Hydrogen Energ.*, 2014, **39** (33), 18929-18939.
